# Supplementary material for: Preferences for Prenatal Tests for Cystic Fibrosis: A Discrete Choice Experiment to Compare the Views of Adult Patients, Carriers of Cystic Fibrosis and Health Professionals
Source: PubMed Central journal article supplement (PMC4449661; doi:10.3390/jcm3010176), 2014-02-14
Supplement: jcm-03-00176-s001.pdf [file jcm-03-00176-s001.pdf]

## Supplementary Information

**Figure S1.** Discrete choice experiment design. (A) Attributes and levels used in the discrete choice experiment; (B) Example of a discrete choice experiment choice set.

| Attribute                            | Levels                   |
|--------------------------------------|--------------------------|
| Accuracy                             | 90%, 95%, 98%, 100%      |
| Time of results (gestation in weeks) | 8, 10, 12, 14            |
| Risk of miscarriage                  | Small risk (1%), No risk |

**A**

| Choice 1            | Test A          | Test B   |
|---------------------|-----------------|----------|
| Accuracy            | 95%             | 100%     |
| Time of results     | 10 weeks        | 12 weeks |
| Risk of miscarriage | Small risk (1%) | No risk  |

Which test would you prefer (*tick one box only*)?

Test A     Test B     Neither

**B**

**Table S1.** Health professional demographic data.

| Demographic data                 | Total ( <i>n</i> = 70) |
|----------------------------------|------------------------|
| <b>Age in years</b>              |                        |
| Mean (SD)                        | 43.3 (10.98)           |
| <b>Gender</b>                    |                        |
| Female                           | 50 (86.2%)             |
| Male                             | 8 (13.8%)              |
| <b>Profession</b>                |                        |
| Clinical geneticist              | 48 (68.6%)             |
| Genetic counsellor               | 22 (31.4%)             |
| <b>Years in profession</b>       |                        |
| ≤5                               | 9 (15.0%)              |
| 6–15                             | 25 (43.3%)             |
| 16–25                            | 17 (28.3%)             |
| ≥26                              | 9 (15.0%)              |
| <b>Current practice location</b> |                        |
| England (London)                 | 9 (18.8%)              |
| England (Regional)               | 24 (50.0%)             |
| Scotland                         | 5 (10.4%)              |
| Northern Ireland                 | 1 (2.1%)               |
| Outside the UK                   | 7 (14.6%)              |
| Not in current practice          | 2 (4.2%)               |

In some cases, numbers may not add up to the total *n* due to missing data. Percentages may not add up to 100 due to rounding.

**Table S2.** Service user demographic data.

| <b>Demographic data</b>            | <b>Total (n = 142)</b> | <b>Affected with CF<br/>(n = 92)</b> | <b>Carrier of CF<br/>(n = 50)</b> |
|------------------------------------|------------------------|--------------------------------------|-----------------------------------|
| <b>Gender</b>                      |                        |                                      |                                   |
| Female                             | 78 (54.9)              | 42 (45.7%)                           | 36 (72.0%)                        |
| Male                               | 64 (45.1)              | 50 (54.4%)                           | 14 (28.0%)                        |
| <b>Age in years</b>                |                        |                                      |                                   |
| Mean (SD)                          | 32.19 (9.84)           | 29.33 (9.85)                         | 37.46 (7.4)                       |
| <b>Ethnicity</b>                   |                        |                                      |                                   |
| White                              | 140 (99.3%)            | 91 (100%)                            | 49 (98.0%)                        |
| Other                              | 1 (0.71%)              | 0 (0%)                               | 1 (2.0%)                          |
| <b>Highest qualification</b>       |                        |                                      |                                   |
| No qualification                   | 1 (0.7%)               | 0 (0%)                               | 1 (2.0%)                          |
| High school                        | 48 (34.8%)             | 34 (38.6%)                           | 14 (28.0%)                        |
| Some college or other training     | 59 (42.8%)             | 37 (42.1%)                           | 22 (44.0%)                        |
| Degree or equivalent               | 30 (21.7%)             | 17 (19.3%)                           | 13 (26.0%)                        |
| <b>Relationship status</b>         |                        |                                      |                                   |
| Married/In a relationship          | 103 (73.6%)            | 65 (71.4%)                           | 38 (77.6%)                        |
| Separated/Divorced                 | 6 (4.3%)               | 1 (1.1%)                             | 5 (10.2%)                         |
| Widowed                            | 1 (0.7%)               | 0 (0%)                               | 1 (2.0%)                          |
| Single                             | 30 (21.4%)             | 25 (27.5%)                           | 5 (10.2%)                         |
| <b>Religious faith</b>             |                        |                                      |                                   |
| Yes                                | 44 (31.9%)             | 23 (25.3%)                           | 21 (44.7%)                        |
| No                                 | 94 (68.1%)             | 68 (74.7%)                           | 26 (55.3%)                        |
| <b>Currently pregnant</b>          |                        |                                      |                                   |
| Yes                                | 4 (2.8%)               | 1 (1.1%)                             | 3 (6.0%)                          |
| No                                 | 138 (2.8%)             | 91 (98.9%)                           | 47 (94.0%)                        |
| <b>Number of children</b>          |                        |                                      |                                   |
| None                               | 79 (56.4%)             | 75 (83.3%)                           | 4 (8.0%)                          |
| 1                                  | 33 (23.6%)             | 11 (12.2%)                           | 22 (44.0%)                        |
| 2 or more                          | 28 (20.0%)             | 4 (4.5%)                             | 24 (48.0%)                        |
| <b>Child with cystic fibrosis?</b> |                        |                                      |                                   |
| Yes                                | 44 (31.9)              | 0 (0%)                               | 44 (91.7%)                        |
| No                                 | 94 (68.1)              | 90 (100%)                            | 4 (8.3%)                          |

In some cases, numbers may not add up to the total *n* due to missing data. Percentages may not add up to 100 due to rounding.

**Table S3.** Service users and health professionals who did not make trades with their choices.

| <b>Test Attributes</b>                             | <b>Affected with CF<br/>(n = 92)</b> | <b>Carrier of CF<br/>(n = 50)</b> | <b>Health Professionals<br/>(n = 70)</b> |
|----------------------------------------------------|--------------------------------------|-----------------------------------|------------------------------------------|
| Chose tests with highest accuracy for all options  | 5 (5.4%)                             | 4 (8.0%)                          | 5 (7.1%)                                 |
| Chose tests with the earliest time for all options | 1 (1.1%)                             | 2 (4.0%)                          | 1 (1.4%)                                 |
| Chose tests with no risk for all options           | 45 (48.9%)                           | 20 (40.0%)                        | 1 (1.4%)                                 |
| Chose neither for all options                      | 3 (3.26%)                            | 0 (0%)                            | 1 (1.4%)                                 |
| <b>Total</b>                                       | <b>54 (58.7%)</b>                    | <b>26 (52.0%)</b>                 | <b>8 (11.4%)</b>                         |

**Table S4.** Ranking of test attributes: Service users.

| <b>Attribute</b> | <b>Ranking (%) *</b> |          |          |          |          |
|------------------|----------------------|----------|----------|----------|----------|
|                  | <b>1</b>             | <b>2</b> | <b>3</b> | <b>4</b> | <b>5</b> |
| Early test       | 8.27                 | 12.78    | 31.58    | 35.34    | 12.03    |
| Accuracy         | 18.80                | 48.87    | 23.31    | 9.02     | 0        |
| Cost             | 0                    | 2.26     | 4.51     | 10.53    | 82.71    |
| Safety           | 62.41                | 18.80    | 11.28    | 7.52     | 0        |
| Full information | 12.03                | 17.29    | 28.57    | 36.84    | 5.26     |

\* n = 133.

**Table S5.** Ranking of test attributes: Health professionals.

| <b>Attribute</b> | <b>Ranking (%) *</b> |          |          |          |          |
|------------------|----------------------|----------|----------|----------|----------|
|                  | <b>1</b>             | <b>2</b> | <b>3</b> | <b>4</b> | <b>5</b> |
| Early test       | 4.69                 | 28.13    | 50.00    | 14.06    | 3.13     |
| Accuracy         | 81.25                | 15.63    | 3.13     | 0        | 0        |
| Cost             | 1.56                 | 0        | 9.38     | 39.06    | 50.00    |
| Safety           | 14.06                | 50.00    | 29.69    | 6.25     | 0        |
| Full information | 0                    | 4.69     | 9.38     | 39.06    | 46.88    |

\* n = 64.
